# Supplementary material for: Decoding Mammalian Ribosome-mRNA States by Translational GTPase Complexes
Source: PubMed Central journal article supplement (PMC5119991; doi:10.1016/j.cell.2016.10.046), 2016-11-17
Supplement: mmc1.pdf [file mmc1.pdf]

**Cell, Volume 167**

**Supplemental Information**

**Decoding Mammalian Ribosome-mRNA States**

**by Translational GTPase Complexes**

**Sichen Shao, Jason Murray, Alan Brown, Jack Taunton, V.  
Ramakrishnan, and Ramanujan S. Hegde**

**Table S1.** Data collection and processing statistics.

|                                           | 80S•P-site<br>tRNA | 80S•<br>aa-tRNA•<br>eEF1A | 80S•eRF1•<br>eRF3 | 80S•eRF1  | 80S•eRF1•<br>ABCE1<br>(combined) | 80S•Pelota•<br>Hbs1•<br>mRNA<br>(truncated) | 80S•Pelota•<br>Hbs1•<br>mRNA<br>(stop) | 80S•Pelota•<br>Hbs1•<br>mRNA<br>(polyA) | 80S•Pelota•<br>Hbs1<br>(combined) |
|-------------------------------------------|--------------------|---------------------------|-------------------|-----------|----------------------------------|---------------------------------------------|----------------------------------------|-----------------------------------------|-----------------------------------|
| <b>Data Collection</b>                    |                    |                           |                   |           |                                  |                                             |                                        |                                         |                                   |
| Voltage (kV)                              | 300                | 300                       | 300               | 300       | 300                              | 300                                         | 300                                    | 300                                     | 300                               |
| Pixel size (Å)                            | 1.04               | 1.04                      | 1.34              | 1.34      | 1.34                             | 1.34                                        | 1.34                                   | 1.34                                    | 1.34                              |
| Defocus range (µm)                        | 0.32-3.97          | 0.71-3.58                 | 0.61-4.57         | 1.20-4.41 | 0.69-5.29                        | 0.97-3.97                                   | 0.55-3.80                              | 0.87-6.13                               | 0.55-6.13                         |
| Defocus mean (µm)                         | 2.15               | 2.21                      | 2.33              | 2.68      | 2.75                             | 2.48                                        | 2.20                                   | 2.50                                    | 2.36                              |
| Electron dose (e- Å <sup>-2</sup> )       | 40                 | 40                        | 30                | 30        | 30                               | 30                                          | 30                                     | 30                                      | 30                                |
| <b>Data processing</b>                    |                    |                           |                   |           |                                  |                                             |                                        |                                         |                                   |
| Independent data collections              | 1                  | 1                         | 2                 | 1         | 4                                | 1                                           | 1                                      | 2                                       | 4                                 |
| Useable micrographs                       | 1,643              | 1,627                     | 2,611             | 1,611     | 5,706                            | 1,815                                       | 1,556                                  | 1,112                                   | 4,483                             |
| Particle picking software                 | EMAN2              | EMAN2/<br>RELION          | EMAN2/<br>RELION  | RELION    | RELION                           | RELION                                      | RELION                                 | EMAN2/<br>RELION                        | EMAN2/<br>RELION                  |
| Particles picked/sorted                   | 158,287            | 139,655                   | 211,664           | 105,812   | 1,248,861                        | 181,880                                     | 167,508                                | 138,488                                 | 487,876                           |
| Particles after 2D classification         | 126,483            | 99,148                    | 189,744           | 100,807   | 1,023,975                        | 179,727                                     | 129,274                                | 127,585                                 | 436,586                           |
| Particles after 3D classification         | 59,594             | -                         | 72,875            | 58,869    | 92,552                           | 67,287                                      | 93,174                                 | 77,534                                  | 237,995                           |
| Particles after FCwSS                     | 25,358             | 46,708                    | 61,752            | 13,852    | 80,571                           | 42,011                                      | 37,432                                 | 20,717                                  | 100,160                           |
| Final particles                           | 25,358             | 40,347                    | 61,752            | 13,852    | 80,571                           | 42,011                                      | 37,432                                 | 20,717                                  | 58,773                            |
| Map sharpening B-factor (Å <sup>2</sup> ) | -51.6              | -64.8                     | -63.3             | -63.8     | -66.4                            | -84.1                                       | -56.8                                  | -63.6                                   | -63.6                             |
| Resolution                                | 3.06               | 3.31                      | 3.65              | 3.75      | 3.35                             | 3.53                                        | 3.67                                   | 3.99                                    | 3.47                              |
| EMDB accession code                       | 4129               | 4130                      | 4131              | 4132      | 4133                             | 4134                                        | 4135                                   | 4136                                    | 4137                              |

**Table S2.** Refinement and model statistics.

|                                              | <b>80S•aa-<br/>tRNA•<br/>eEF1A</b> | <b>80S•eRF1•<br/>eRF3</b> | <b>80S•eRF1</b>           | <b>80S•eRF1•<br/>ABCE1<br/>(combined)</b> | <b>80S•Pelota•<br/>Hbs1•<br/>mRNA(trun)</b> | <b>80S•Pelota•<br/>Hbs1•<br/>mRNA(stop)</b> | <b>80S•Pelota•<br/>Hbs1•<br/>mRNA<br/>(polyA)</b> | <b>80S•Pelota•<br/>Hbs1<br/>(combined)</b> |
|----------------------------------------------|------------------------------------|---------------------------|---------------------------|-------------------------------------------|---------------------------------------------|---------------------------------------------|---------------------------------------------------|--------------------------------------------|
| <b>Model composition</b>                     |                                    |                           |                           |                                           |                                             |                                             |                                                   |                                            |
| Non-hydrogen atoms                           | 220,874                            | 222,676                   | 219,116                   | 223,868                                   | 222,092                                     | 221,999                                     | 221,906                                           | 221,999                                    |
| Protein residues                             | 12,144                             | 12,555                    | 12,111                    | 12,704                                    | 12,505                                      | 12,497                                      | 12,490                                            | 12,497                                     |
| RNA bases                                    | 5,747                              | 5,678                     | 5,678                     | 5,678                                     | 5,671                                       | 5,671                                       | 5,670                                             | 5,671                                      |
| Nucleotide/inhibitor                         | GDP/<br>didemnin B                 | GMPPCP                    | -                         | -                                         | GMPPCP                                      | GMPPCP                                      | GMPPCP                                            | GMPPCP                                     |
| Metals (Zn <sup>2+</sup> /Mg <sup>2+</sup> ) | 8/276                              | 8/282                     | 8/258                     | 8/302                                     | 8/281                                       | 8/264                                       | 8/236                                             | 8/264                                      |
| <b>Refinement</b>                            |                                    |                           |                           |                                           |                                             |                                             |                                                   |                                            |
| Resolution (Å)                               | 3.31                               | 3.65                      | 3.75                      | 3.35                                      | 3.53                                        | 3.67                                        | 3.99                                              | 3.47                                       |
| Average B factor (Å <sup>2</sup> )           | 110.3                              | 93.6                      | 99.1                      | 90.9                                      | 111.1                                       | 108.9                                       | 113.8                                             | 109.4                                      |
| FSC <sub>average</sub>                       | 0.85                               | 0.87                      | 0.82                      | 0.82                                      | 0.83                                        | 0.83                                        | 0.83                                              | 0.86                                       |
| <b>R.m.s. deviations</b>                     |                                    |                           |                           |                                           |                                             |                                             |                                                   |                                            |
| Bond lengths (Å)                             | 0.005                              | 0.005                     | 0.006                     | 0.005                                     | 0.006                                       | 0.005                                       | 0.006                                             | 0.006                                      |
| Bond angles (°)                              | 1.00                               | 0.96                      | 1.10                      | 0.89                                      | 1.01                                        | 0.99                                        | 1.1                                               | 1.1                                        |
| <b>Validation</b>                            |                                    |                           |                           |                                           |                                             |                                             |                                                   |                                            |
| Molprobity score<br>(percentile)             | 2.13 (100 <sup>th</sup> )          | 1.97 (100 <sup>th</sup> ) | 2.11 (100 <sup>th</sup> ) | 1.86 (100 <sup>th</sup> )                 | 2.08 (100 <sup>th</sup> )                   | 2.01 (100 <sup>th</sup> )                   | 2.35 (99 <sup>th</sup> )                          | 2.01 (100 <sup>th</sup> )                  |
| Clashscore, all atoms<br>(percentile)        | 2.05 (100 <sup>th</sup> )          | 1.76 (100 <sup>th</sup> ) | 2.54 (100 <sup>th</sup> ) | 1.47 (100 <sup>th</sup> )                 | 2.37 (100 <sup>th</sup> )                   | 1.87 (100 <sup>th</sup> )                   | 3.51 (100 <sup>th</sup> )                         | 1.87 (100 <sup>th</sup> )                  |
| Favored rotamers (%)                         | 83.5                               | 84.0                      | 82.8                      | 85.9                                      | 83.1                                        | 83.5                                        | 80.6                                              | 83.5                                       |
| Poor rotamers (%)                            | 6.7                                | 6.1                       | 6.7                       | 5.6                                       | 6.6                                         | 6.3                                         | 7.7                                               | 6.3                                        |
| <b>Ramachandran plot</b>                     |                                    |                           |                           |                                           |                                             |                                             |                                                   |                                            |
| Favored (%)                                  | 93.3                               | 93.2                      | 93.1                      | 94.0                                      | 93.1                                        | 92.7                                        | 90.6                                              | 93.0                                       |
| Outliers (%)                                 | 0.5                                | 0.5                       | 0.4                       | 0.2                                       | 0.5                                         | 0.5                                         | 1.0                                               | 0.5                                        |
| <b>Validation (RNA)</b>                      |                                    |                           |                           |                                           |                                             |                                             |                                                   |                                            |
| Correct sugar puckers<br>(%)                 | 98.0                               | 97.8                      | 97.7                      | 97.8                                      | 97.7                                        | 97.8                                        | 97.7                                              | 97.8                                       |
| Good backbone<br>conformations (%)           | 75.4                               | 75.1                      | 74.4                      | 75.0                                      | 75.1                                        | 75.5                                        | 73.5                                              | 75.5                                       |
